# Supplementary material for: MALAT1-dependent hsa_circ_0076611 regulates translation rate in triple-negative breast cancer
Source: PubMed Central journal article supplement (PMC9203778; doi:10.1038/s42003-022-03539-x), 2022-06-16

## Supplementary Figures and Tables

### **MALAT1-dependent hsa\_circ\_0076611 regulates translation rate in triple-negative breast cancer**

Chiara Turco<sup>1</sup>, Gabriella Esposito<sup>1</sup>, Alessia Iaiza<sup>2</sup>, Frauke Goeman<sup>3</sup>, Anna Benedetti<sup>2</sup>, Enzo Gallo<sup>4</sup>, Theodora Daralioti<sup>4</sup>, Letizia Perracchio<sup>4</sup>, Andrea Sacconi<sup>5</sup>, Patrizia Pasanisi<sup>6</sup>, Paola Muti<sup>7,8</sup>, Claudio Pulito<sup>1</sup>, Sabrina Strano<sup>3</sup>, Zaira Ianniello<sup>9</sup>, Alessandro Fatica<sup>9</sup>, Mattia Forcato<sup>10</sup>, Francesco Fazi<sup>2,\*</sup>, Giovanni Blandino<sup>1,\*</sup>, Giulia Fontemaggi<sup>1,\*</sup>

<sup>1</sup>Oncogenomic and Epigenetic Unit, IRCCS Regina Elena National Cancer Institute, Rome, 00144, Italy

<sup>2</sup>Department of Anatomical, Histological, Forensic & Orthopedic Sciences, Section of Histology & Medical Embryology, Sapienza University of Rome, laboratory affiliated to Istituto Pasteur Italia-Fondazione Cenci Bolognetti, Rome, Italy;

<sup>3</sup>UOSD SAFU, Department of Research, Advanced Diagnostics, and Technological Innovation, Translational Research Area, IRCCS Regina Elena National Cancer Institute, Rome, Italy.

<sup>4</sup>Department of Pathology, IRCCS Regina Elena National Cancer Institute, Rome, 00144, Italy

<sup>5</sup>UOSD Clinical Trial Center, Biostatistics and Bioinformatics, IRCCS Regina Elena National Cancer Institute, Rome, 00144, Italy

<sup>6</sup>Unit of Epidemiology and Prevention, Fondazione IRCCS Istituto Nazionale dei Tumori, Milan, Italy

<sup>7</sup>Department of Health Research Methods, Evidence, and Impact, Faculty of Health Sciences, McMaster University, Hamilton, Ontario, Canada.

<sup>8</sup>Department of Biomedical, Surgical and Dental Sciences, "Università degli Studi di Milano", Milan, Italy.

<sup>9</sup>Department of Biology and Biotechnology 'Charles Darwin', Sapienza University of Rome, Rome, Italy

<sup>10</sup>Department of Life Sciences, University of Modena and Reggio Emilia, Modena, Italy

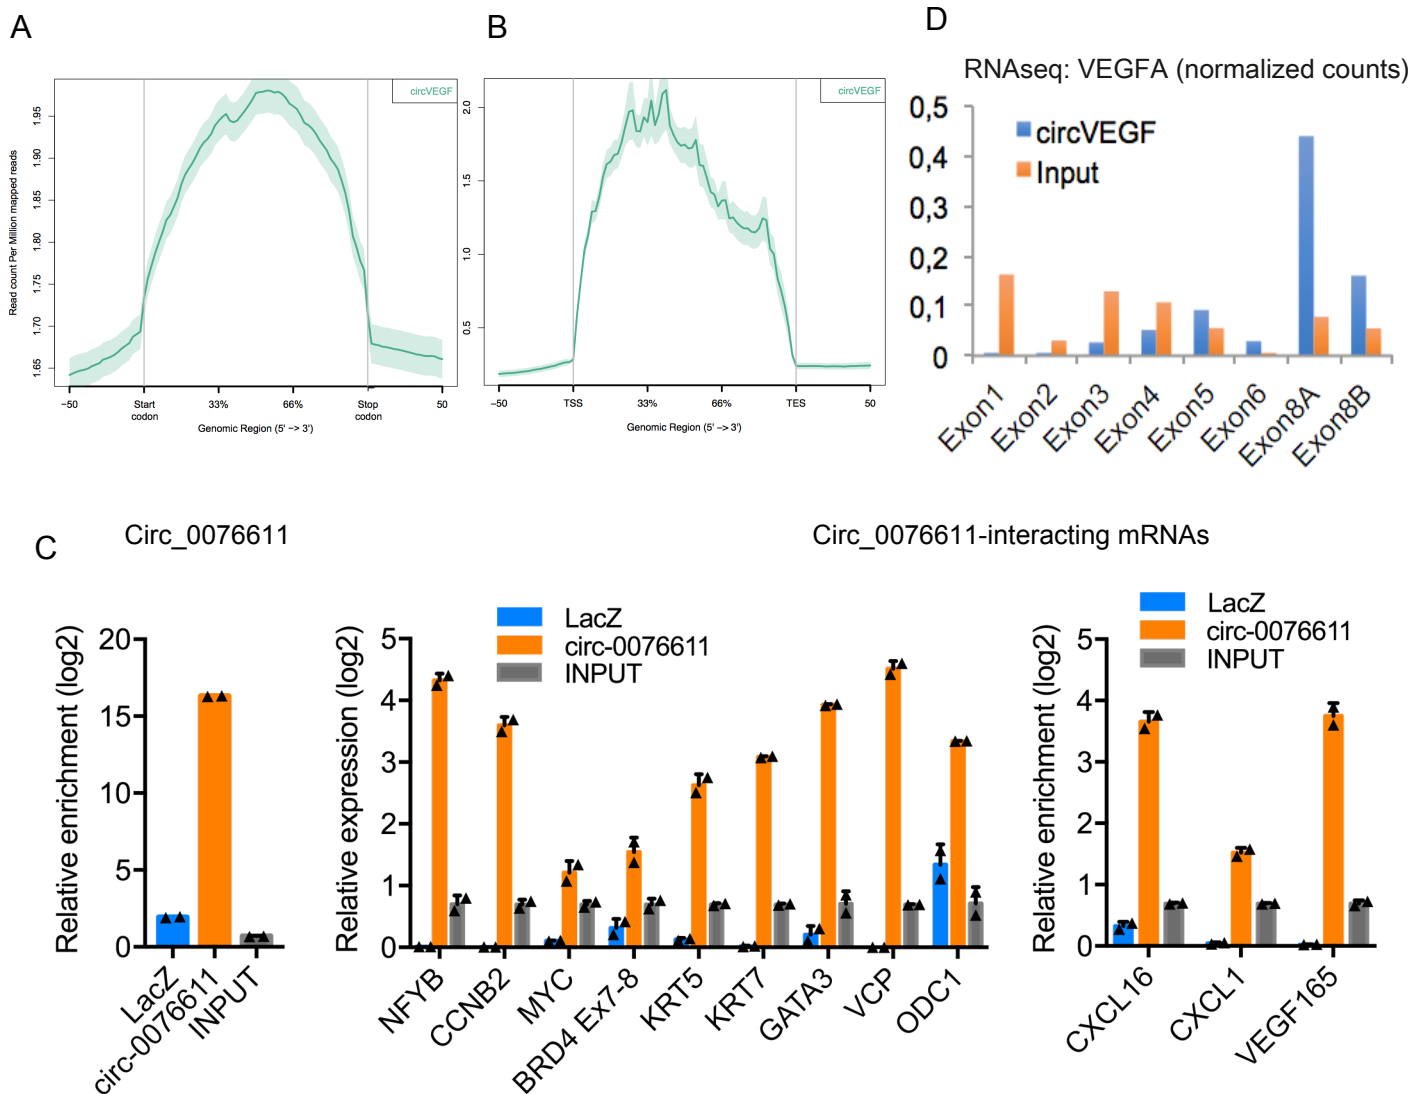

### Supplementary Figure 1.

A-B. Distribution of the mean signal profile of ChIRP-RNAseq reads relative to the coding sequence (from start codon to stop codon)(A) or to the gene body (from transcription start to transcription end)(B) of target mRNAs.

C.ChIRP experiments performed in HCC1954 cells to recover circ-0076611 (left) and its target mRNAs (middle, right)(n=2).

D. Graph reporting the ChIRP-RNAseq result of circ-0076611 for individual VEGFA exons after removal of signal from VEGFA exon 7. Exon counts have been normalized relatively to VEGFA expression.

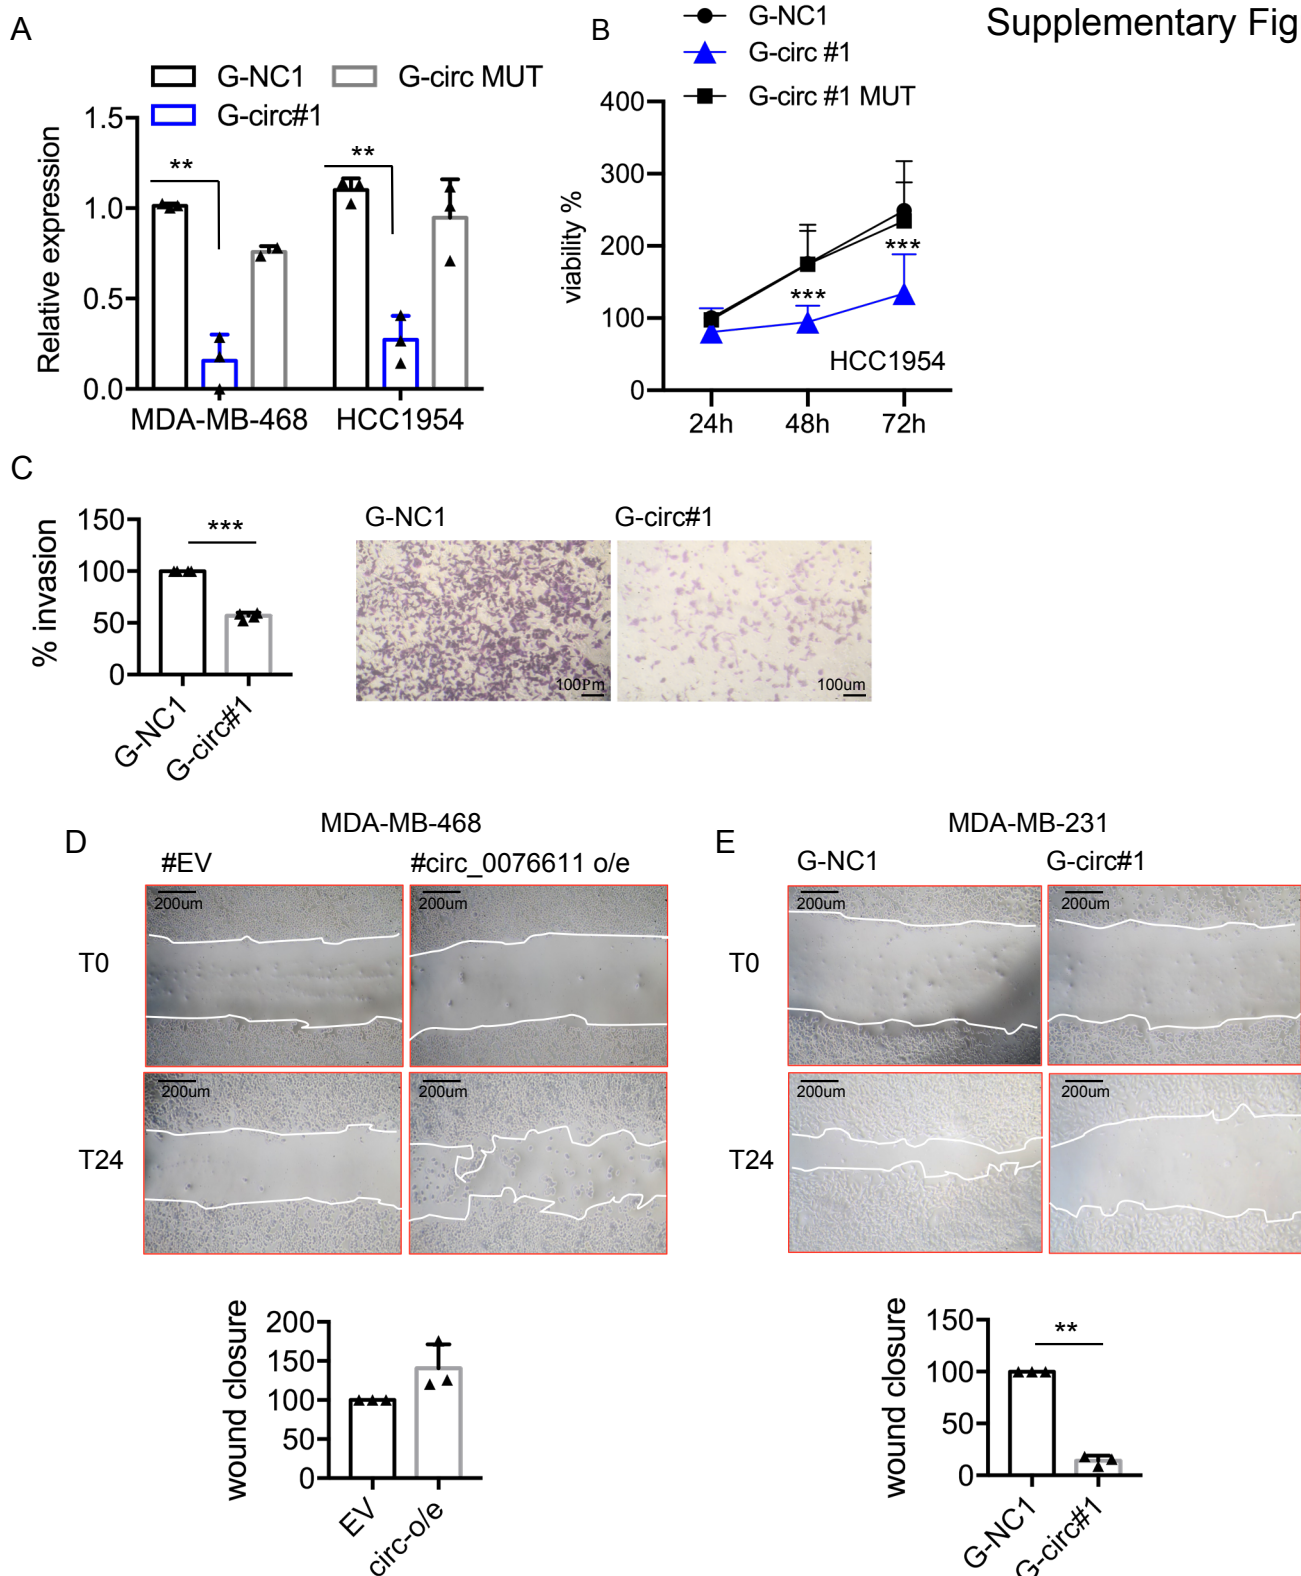

**Supplementary Figure 2.** A. RT-qPCR of circ-0076611 in MDA-MB-468 and HCC1954 cells, transfected with circ\_0076611 GapmeR oligonucleotide (G-circ#1) or control GapmeR G-circ#1 MUT, carrying a 5-nt substitution, or control GapmeR G-NC1, and used for the viability assays shown in Figure 3H and S2B, respectively (n=3). B. Viability evaluated using ATPlite assay. C. Invasion assay performed by transwell assay using matrigel-coated inserts with MDA-MB-231 cells transfected with GapmeR antisense oligonucleotide directed to circ\_0076611 (G-circ#1) or control GapmeR (G-NC1). D. Wound healing migration assay performed on control (EV) and circ\_0076611-overexpressing (o/e) MDA-MB-468, evaluated at 24h (T24). E. Wound healing migration assay performed in MDA-MB-231 cells transfected with GapmeR antisense oligonucleotide directed to circ\_0076611 (G-circ#1) or control GapmeR (G-NC1), evaluated at 24h (T24). The results of at least three biological replicates are shown. \*\* $P \leq 0.005$ ; \*\*\* $P \leq 0.0005$  (paired, two-tailed Student's t-test).

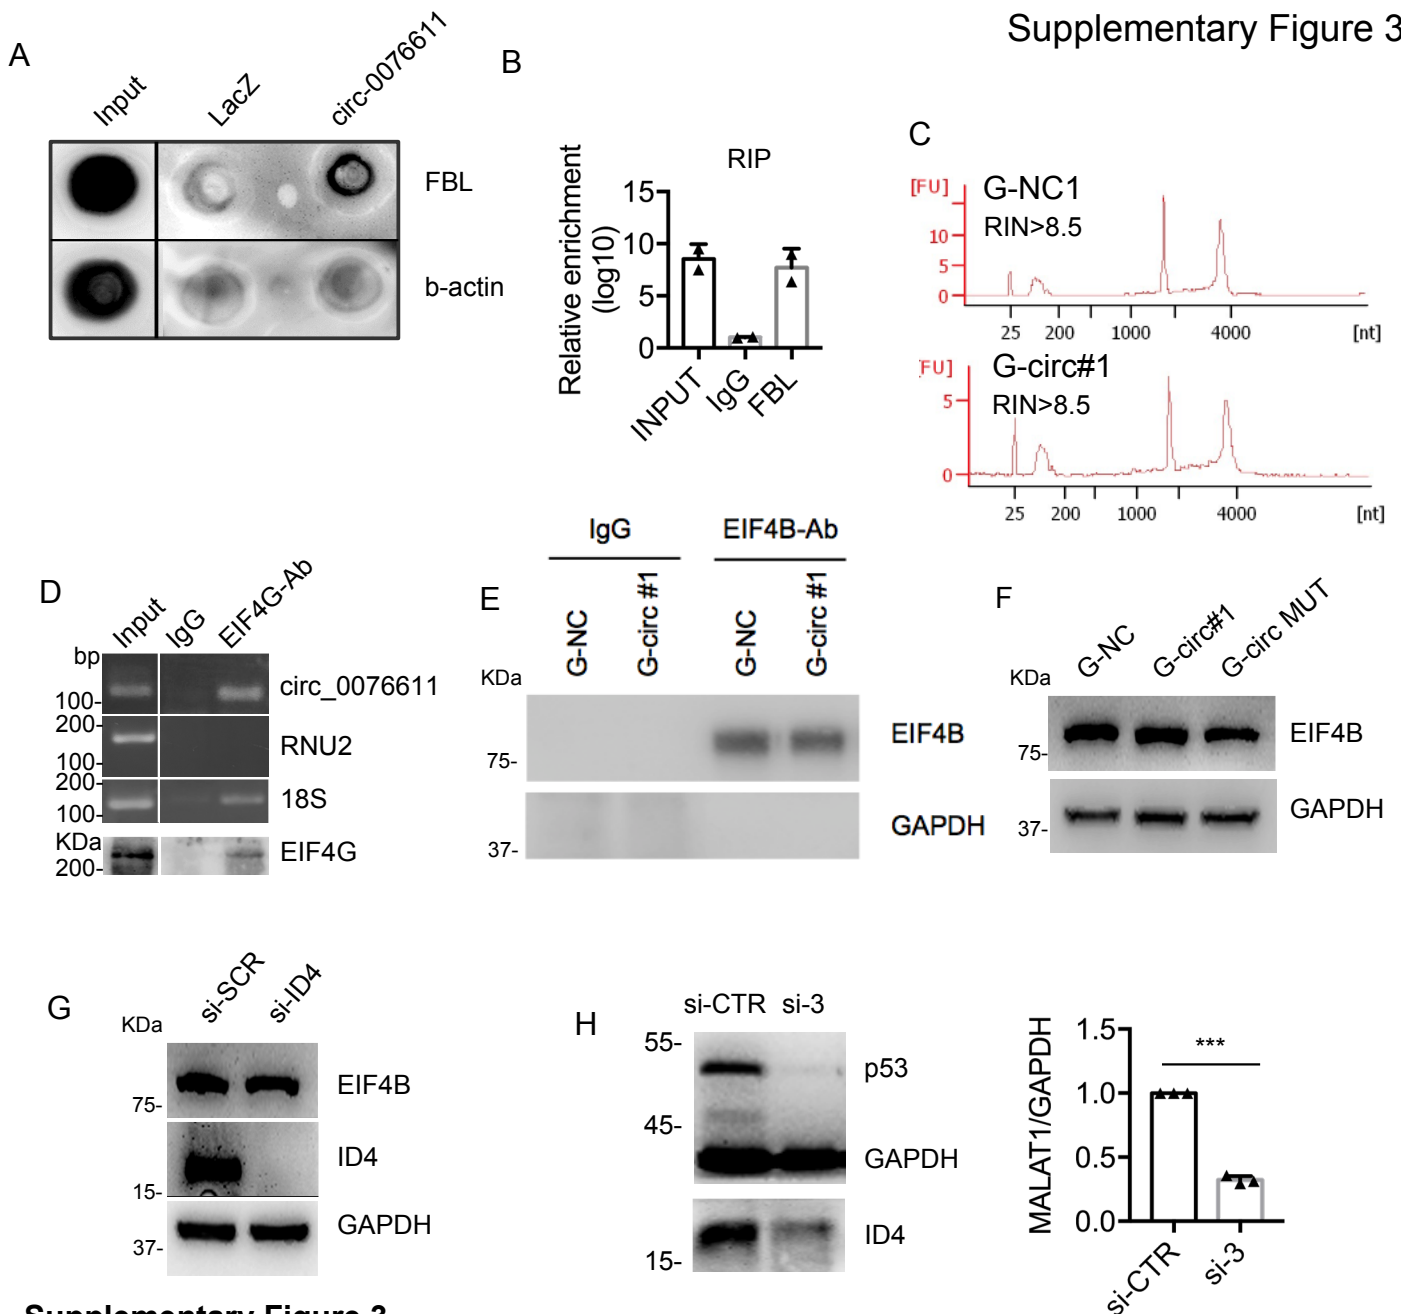

### Supplementary Figure 3.

A. Dot blot analysis of fibrillarlin (FBL) and beta-actin proteins on eluates from ChIRP experiments performed in MDA-MB-468, using a circ-0076611 antisense biotinylated oligonucleotide or a control LacZ oligonucleotide. Input sample has been included as positive control.

B. RT-qPCR of circ-0076611 in RIP experiments performed in MDA-MB-468 lysates by using an antibody directed to fibrillarlin (FBL) or IgG as negative control (N=2). Data are normalized over RNU2 expression and presented as folds of enrichment over IgG sample.

C. Representative images of bioanalyzer electropherograms of total RNA from control (G-NC1) and circ-0076611-depleted (G-circ#1) MDA-MB-468 cells obtained using RNA 600 nano kit (Agilent Technologies).

D. Representative RIP assay in MDA-MB-468 cells crosslinked with formaldehyde using an antibody directed to eIF4G.

E. A fraction (25%) of eluates recovered during RIP experiments presented in Figure 5J has been used for protein analysis by WB to control recovery of EIF4B in control (G-NC) and circ-0076611-depleted (G-circ#1) MDA-MB-468 cells.

F-G. Western blot analysis of the indicated proteins in MDA-MB-468 cells depleted of circ\_0076611 (left) or of ID4 (right) expression by siRNA transfection for 72h.

H. Expression of ID4 and mutant p53 proteins (left) as well as of lncRNA MALAT1 (right) has been evaluated by western blot (left) and RT-qPCR (right) in MDA-MB-468 cells transfected with siRNAs to ID4 and mutant p53, and with ASO to MALAT1 (si-3) or control oligonucleotides (si-CTR) for 48h.

A

|                | position    | length | sequence                                                                |
|----------------|-------------|--------|-------------------------------------------------------------------------|
| Stem_1_5prime  | 45 ~ 103    | 59     | ctggctccttccctggctctcatcctcctggcccggtctctctctcactc<br>tctcactcc         |
| Stem_1_3prime  | 1285 ~ 1347 | 63     | ggagagagagagagaaagagagtgagcgagcgagcgagcgggagagcgcc<br>tgagaggggcccag    |
| Stem_2_5prime  | 44 ~ 103    | 60     | cctggctccttccctggctctcatcctcctggcccggtctctctctcact<br>tctcactcc         |
| Stem_2_3prime  | 1285 ~ 1350 | 66     | ggagagagagagagaaagagagtgagcgagcgagcgagcgggagagcgcc<br>tgagaggggcccagctg |
| Stem_3_5prime  | 828 ~ 880   | 53     | gagacacagcattgcccttatggcagcctctcctgcaactctctgccg<br>tct                 |
| Stem_3_3prime  | 1309 ~ 1357 | 49     | agcgagcgagcgagcgggagagcgctgagaggggcccagctgcttgctc                       |
| Stem_4_5prime  | 156 ~ 184   | 29     | gggtgaaatgggggtgccgacttggcctg                                           |
| Stem_4_3prime  | 2411 ~ 2438 | 28     | cagggccaaggcaccaccagctcacc                                              |
| Stem_5_5prime  | 652 ~ 687   | 36     | agcctcccatcacacctactttagcccacttgg                                       |
| Stem_5_3prime  | 2576 ~ 2611 | 36     | accaagagggcgatatattagtgtctgggtggggct                                    |
| Stem_6_5prime  | 796 ~ 818   | 23     | cctgtggcctgagactcaccct                                                  |
| Stem_6_3prime  | 2635 ~ 2657 | 23     | aggggagtctcagttccccagg                                                  |
| Stem_7_5prime  | 610 ~ 637   | 28     | tggccaccagcggcctggcctggggaca                                            |
| Stem_7_3prime  | 3159 ~ 3182 | 24     | tgtccccagggcaggcccttgcca                                                |
| Stem_8_5prime  | 1300 ~ 1338 | 39     | aagagagtgagcgagcgagcgagcgggagagcgctgag                                  |
| Stem_8_3prime  | 3212 ~ 3247 | 36     | ctcaggcgttctcccagaagatctgccactctctt                                     |
| Stem_9_5prime  | 1860 ~ 1913 | 54     | ccccgtcagactgaggctccctcaggccagggtatgtctccctcctca<br>gact                |
| Stem_9_3prime  | 3436 ~ 3489 | 54     | agctcaggaggggtgactgggagcccctgagtgagctgctgctcaggcc<br>ggg                |
| Stem_10_5prime | 593 ~ 628   | 36     | ccctgccctgggcccctctggccaccagcggcctggc                                   |
| Stem_10_3prime | 3477 ~ 3510 | 34     | gctcaggccgggctcctcctgagggcagggtgg                                       |

B

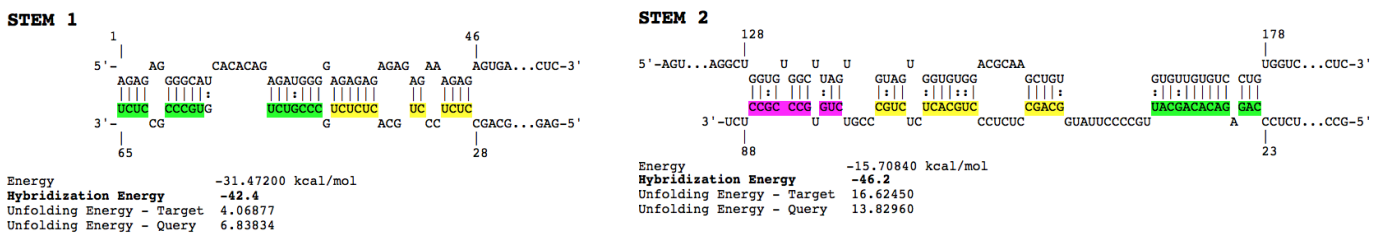

C

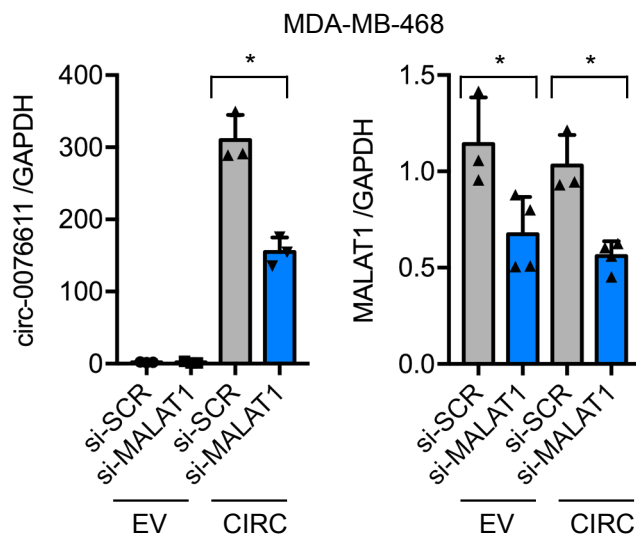

D

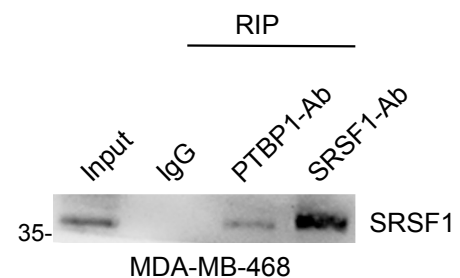

## Supplementary Figure 4.

A. Inverted-repeated sequences, potentially involved in the formation of stem-loop structures, present in the introns flanking VEGFA exon 7 (intron 6 and 7) were initially identified using RegRNA 2.0 tool (<http://regna2.mbc.nctu.edu.tw/>).

B. The prediction of hybridization for the two couples of inverted-repeated sequences closest to exon 7, identified by RegRNA analysis, and included in the fragment of VEGFA gene cloned in the circ-0076611 expression vector, has been carried out using the IntaRNA bioinformatic tool (<http://rna.informatik.uni-freiburg.de/IntaRNA>).

C. Expression of circ\_0076611 (left) and MALAT1 (right), evaluated by RT-qPCR in MDA-MB-468 cells transiently transfected with a pCDNA3.1 vector (EV) or with the circ\_0076611 expression vector (CIRC), in presence (si-SCR) or absence (si-MALAT1) of MALAT1.

D. Western blot analysis of SRSF1 on proteins recovered using SRSF1-Ab and PTBP1-Ab in RIP experiment in MDA-MB-468.

```

gcctgagactcacccttgtctcccagagacacagcattgc
cccttatggcagcctctccctgcactctctgcccgctctgtgccgcctct
tcttgccggcaggtgtcctagccagtgtgcctctttccgccgctctctct
gtcttttgctgtagcgtcggatccttcagggcctgggggctgaccggc
tgggtgggggtgcagctgcggacatgtaggggtgttgcattggtgattt
ttttctctctctctctgctgatgctctagcttagatgtctttccttttgcc
tttttgcaTCCCTGTGGGCCTTGCTCAGAGCGGAGAAAGCATTGTTG
TACAAGATCCGCAGACGTGTAATGTTTCCTGCAAAAACACAGACTCGCGT
TGCAAGGCGAGGCAGCTTGAGTTAAACGAACGTACTTGCAGgttgggtcc
cagagggcaagcaagtcagagaggggcatcacacagagatggggagagag
agagagaaagagagtgagcgagcgagcgagcgaggagagcgcctgagaggg
gccagctgcttgctcagtttctagctgcctgccgggtgactgctgccttc
tctgcttttaaggcccctgtggtgggctgcaggcactggtccagcctggc
ggggcctgttccgaggttgccctggttgccctgagtggtaggctggtgtgg
cttagtgtagtggtgtggacgcaagctgtgtgtgtgtcctgtggctcctt
ctgctc

```

Intron 6

Exon 7

Intron 7

SRSF1  
PTBP1

**Supplementary Figure 5.** VEGFA genomic region cloned in pCDNA3.1 plasmid to generate a circ-0076611 expression vector. Predicted binding sites for SRSF1 and PTBP1 splicing regulators are indicated.

**Supplementary Table 1.** List of siRNA and GapmeR sequences used in the study.

| <b>siRNA</b>                        | <b>Sequence</b>                                                                         |
|-------------------------------------|-----------------------------------------------------------------------------------------|
| circ_0076611 (IdT)                  | For 5'-AACGUACUUGCAGUCCUGUGUU-3'                                                        |
|                                     | Rev 5'-AACACAGGGACUGCAAGUACGUU-3'                                                       |
| MALAT1#1<br>(IdT hs.Ri.MALAT1.13.1) | For 5'-GCUCCUUGGUGAAUUGAUAGUAAA-3'                                                      |
|                                     | Rev 5'-UUUACUUAUCAAUUCACCAAGGAGCUG-3'                                                   |
| MALAT1#2                            | 5'-GATCCATAATCGGTTTCAA-3'                                                               |
| ASO-MALAT1                          | mG*mG*mG*mA*mG*T*T*A*C*T*T*G*C*C*A*mA*mC*mU*mU*<br>mG<br>(from Tripathi, Mol Cell 2010) |
| ASO-SCR                             | mC*mU*mA*mU*mA*A*C*G*G*C*G*C*T*C*G*mA*mU*<br>mG*mA*mU                                   |
| SRSF1#1                             | 5'-GAAAGAAGATATGACCTAT-3'                                                               |
| SRSF1#2                             | 5'-TGAAGCAGGTGATGTATGT-3'                                                               |
| ID4-siRNA                           | For 5'-GATCCTGCAGCACGTTATC-3'                                                           |
|                                     | Rev 5'-TTACAGAGCTCTTGATATC-3'                                                           |
| p53_siRNA                           | 5'-GACUCCAGUGGUAUUCUAC-3' (Brummelkamp et al 2002; doi: 10.1126/science.1068999)        |
| si-PTBP1                            | Trifecta RNAi kit (IdT) hs.Ri.PTBP1.13                                                  |
| si-SCR for 27-mer                   | Negative Control DsiRNA (IdT)                                                           |
| si-SCR for 21-mer                   | 5'-CTATAACGGGCTCGATAT-3'                                                                |
| <b>GapmeR</b>                       | <b>Sequence</b>                                                                         |
| G-circ                              | 5'-CAGGGACTGCAAGTAC-3'                                                                  |
| G-circMUT                           | 5'-CAGGTCAGCCAAGTAC-3'                                                                  |
| G-NC                                | 5'-AACACGTCTATACGC-3'                                                                   |

# Uncropped gels relative to Figure 1

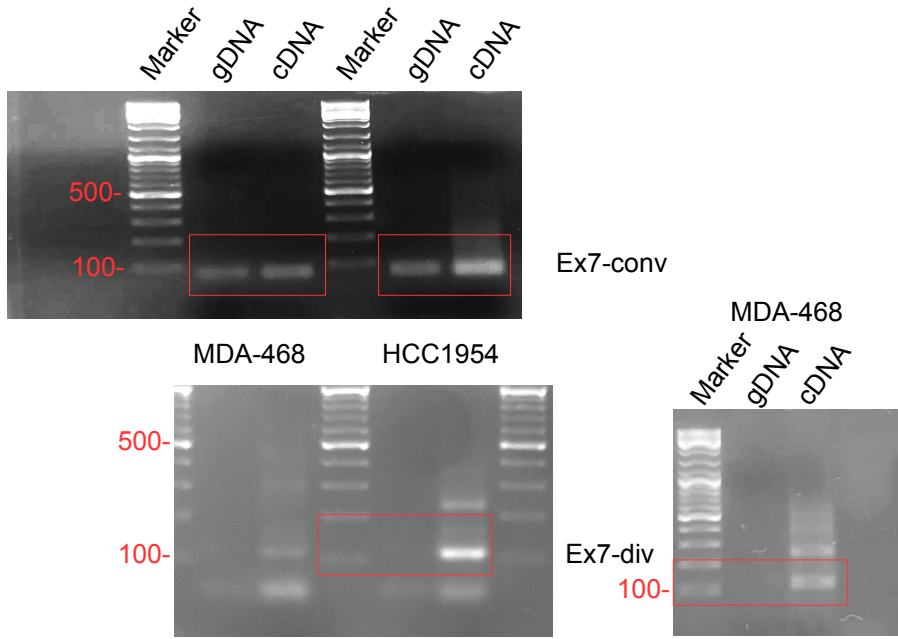



Uncropped blots relative to Figure 2G

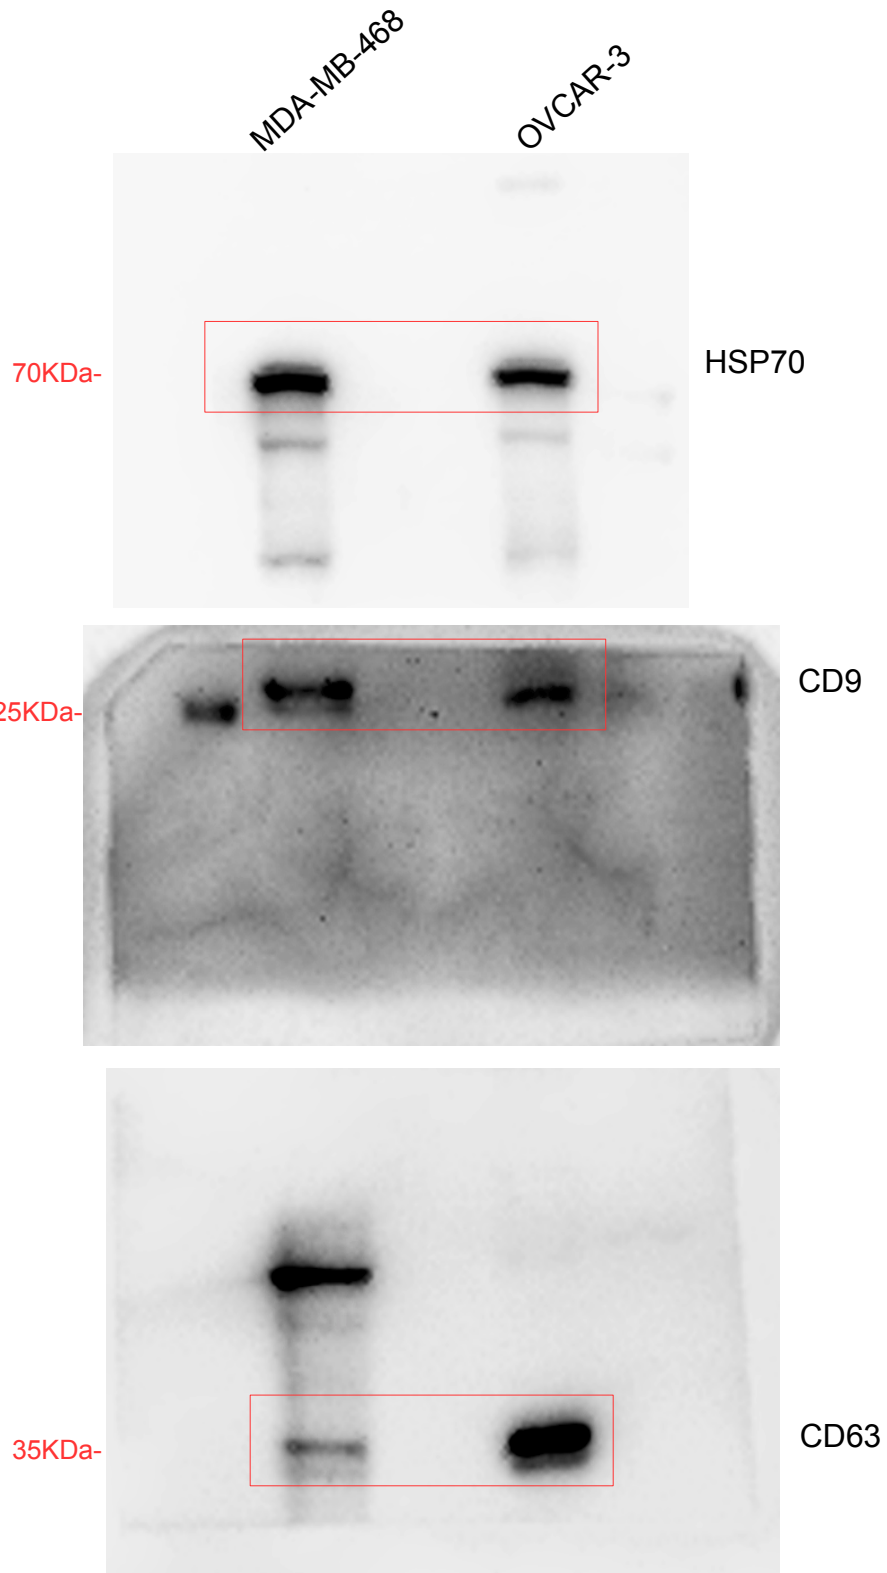

Uncropped blots relative to Figure 3J

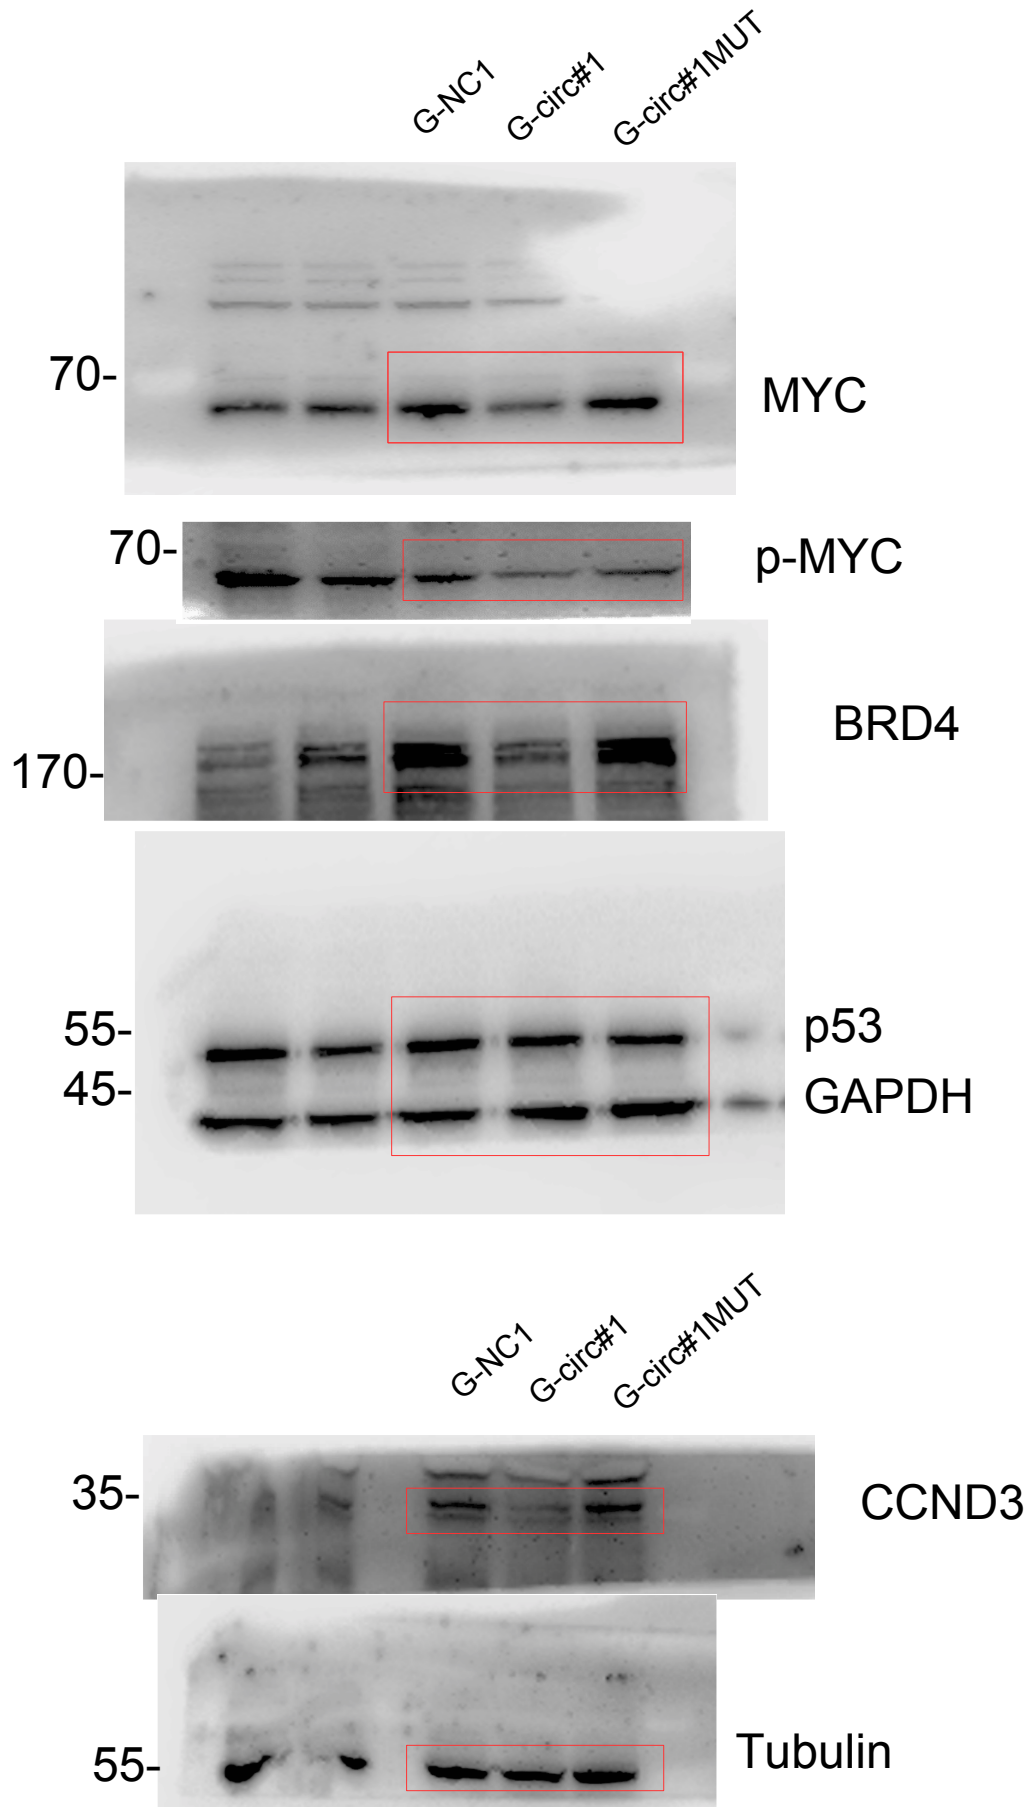

Uncropped blots relative to Figure 3K

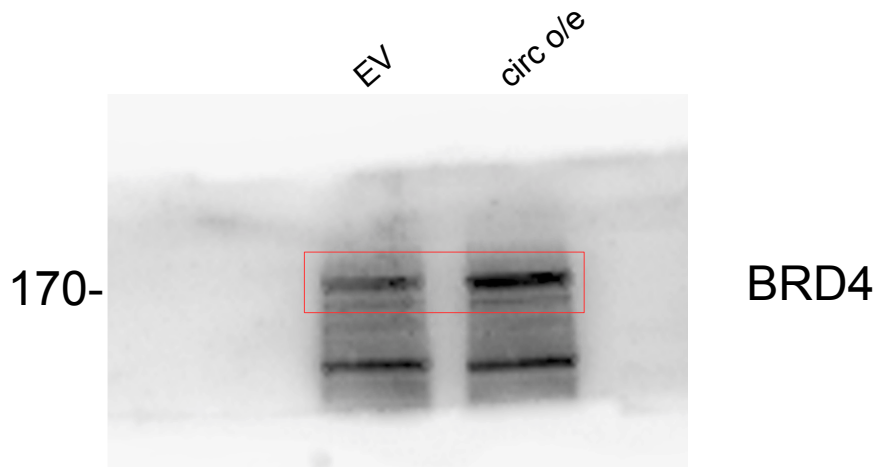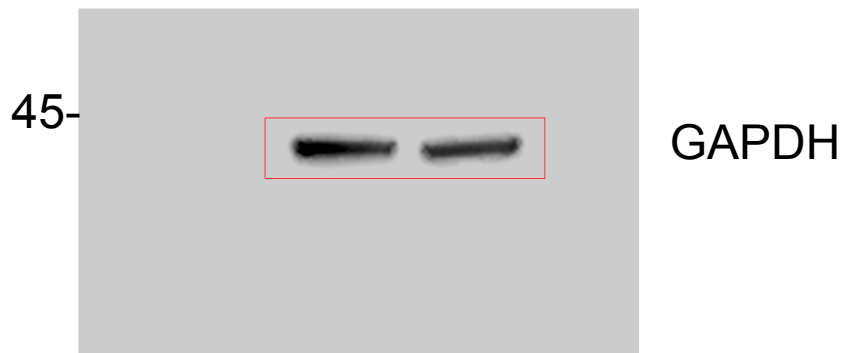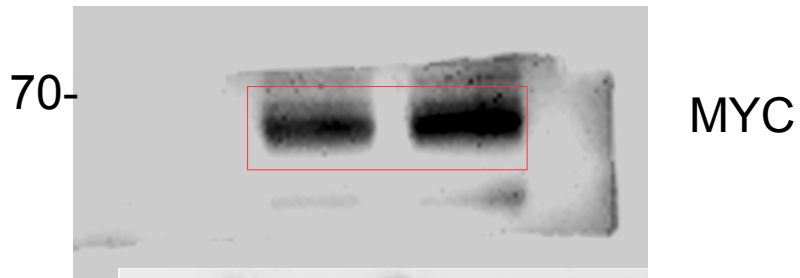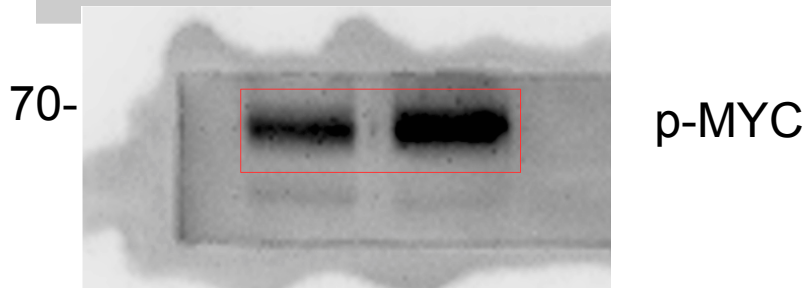

Uncropped blots relative to Figure 4E-F

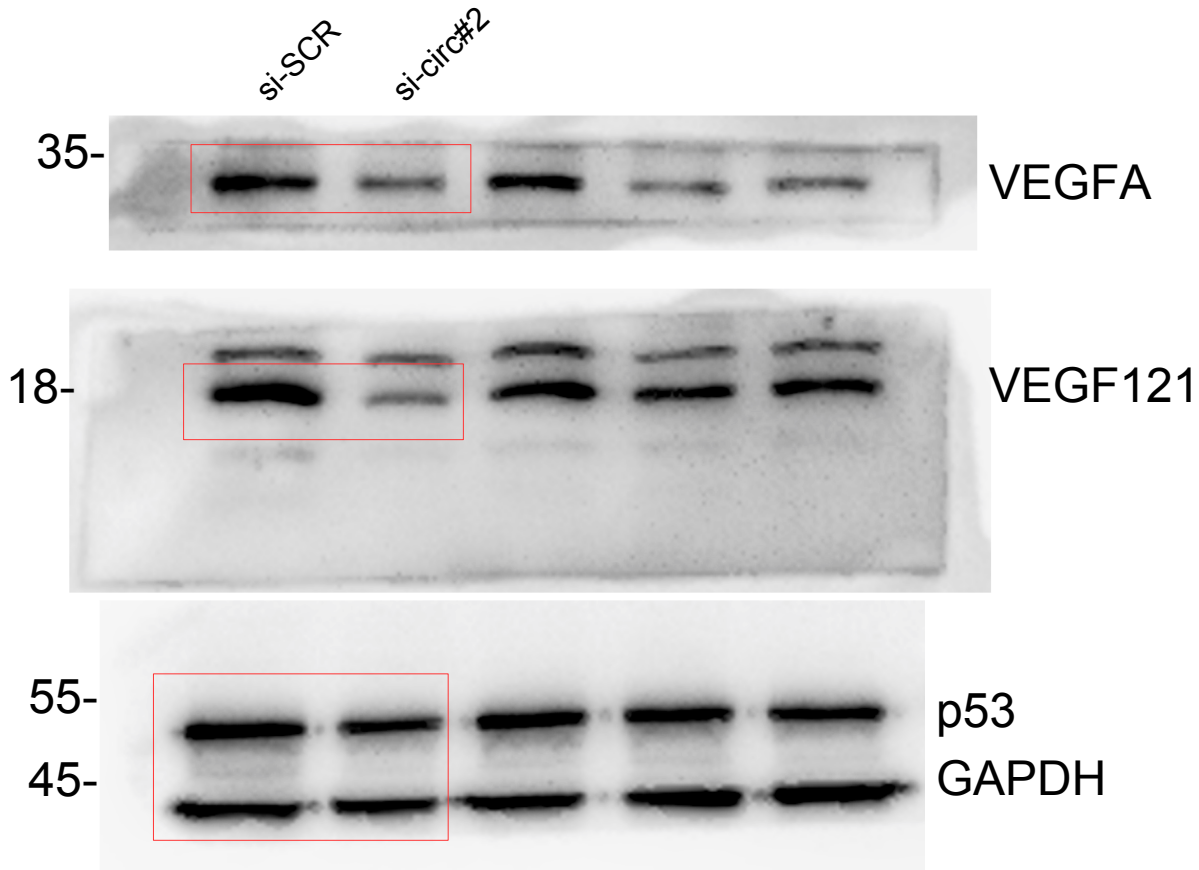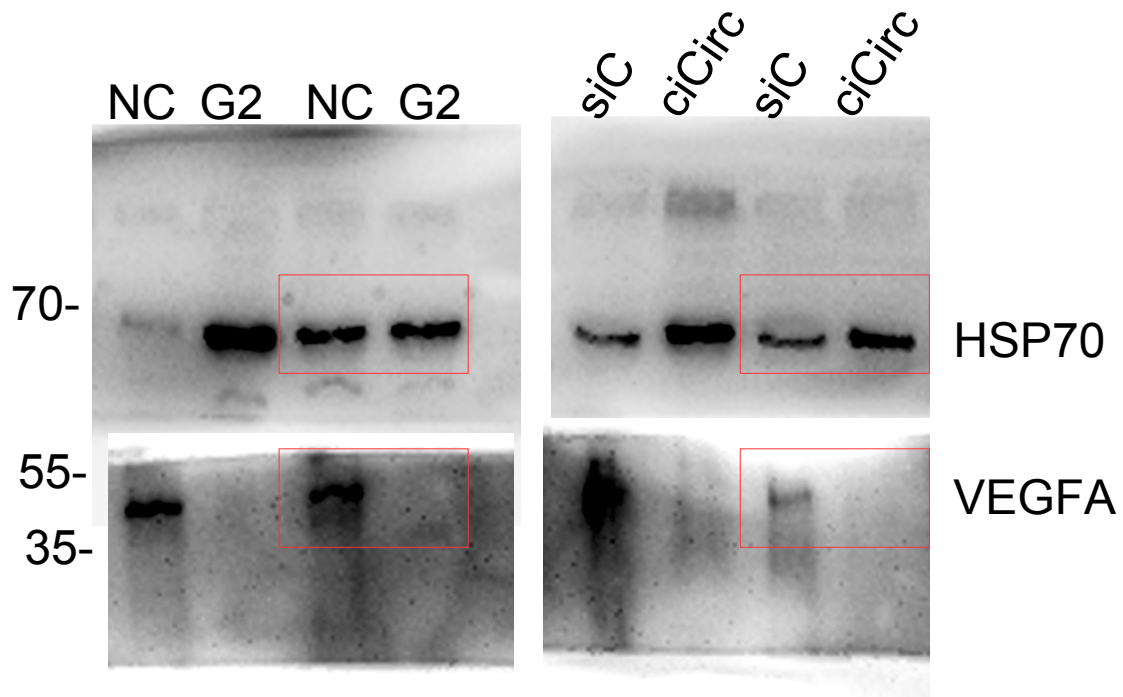

# Uncropped blots relative to Figure 5

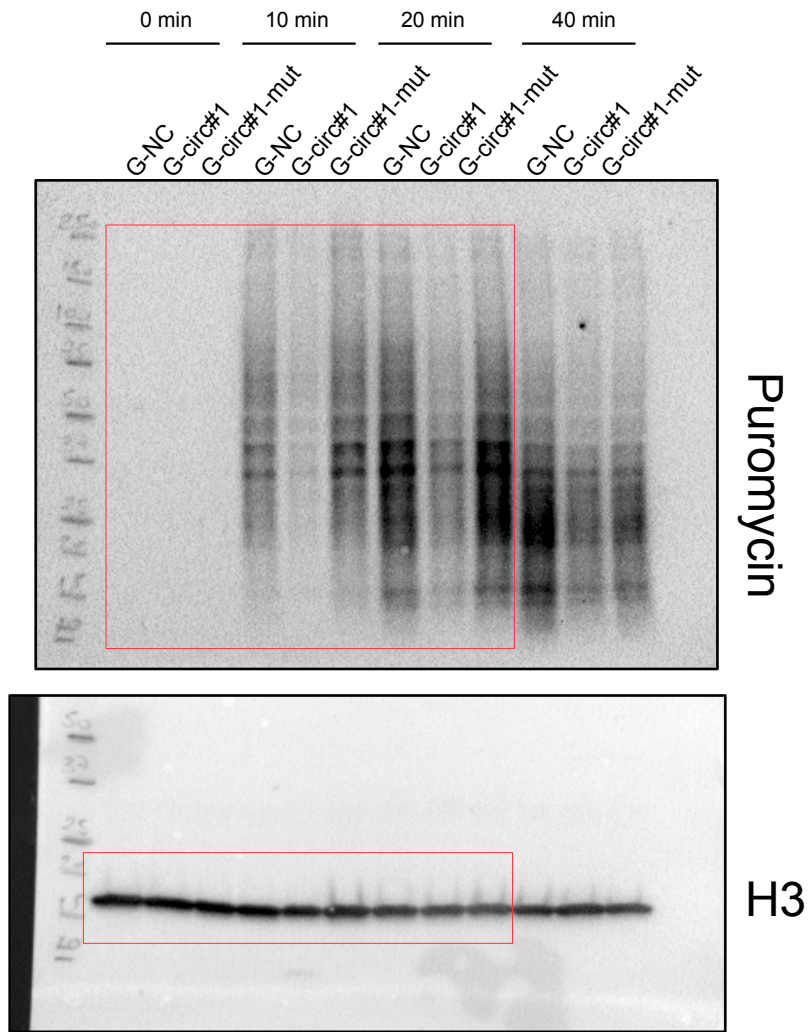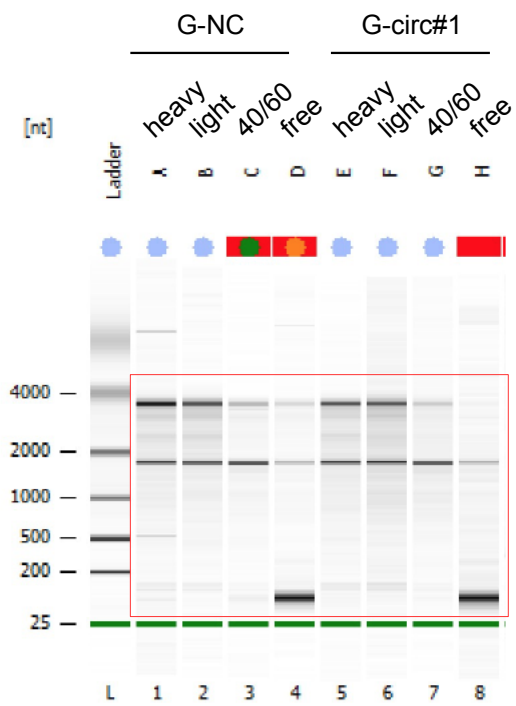

Uncropped gels relative to Figure 6

A

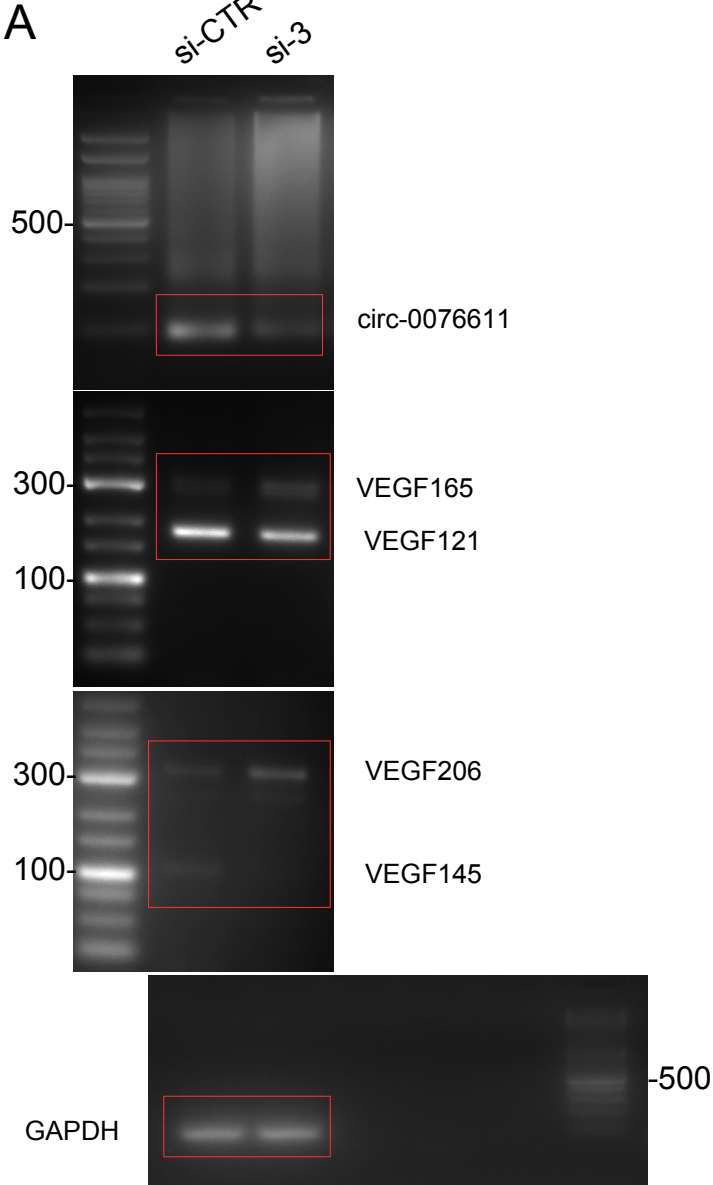

# Uncropped blots relative to Figure 6

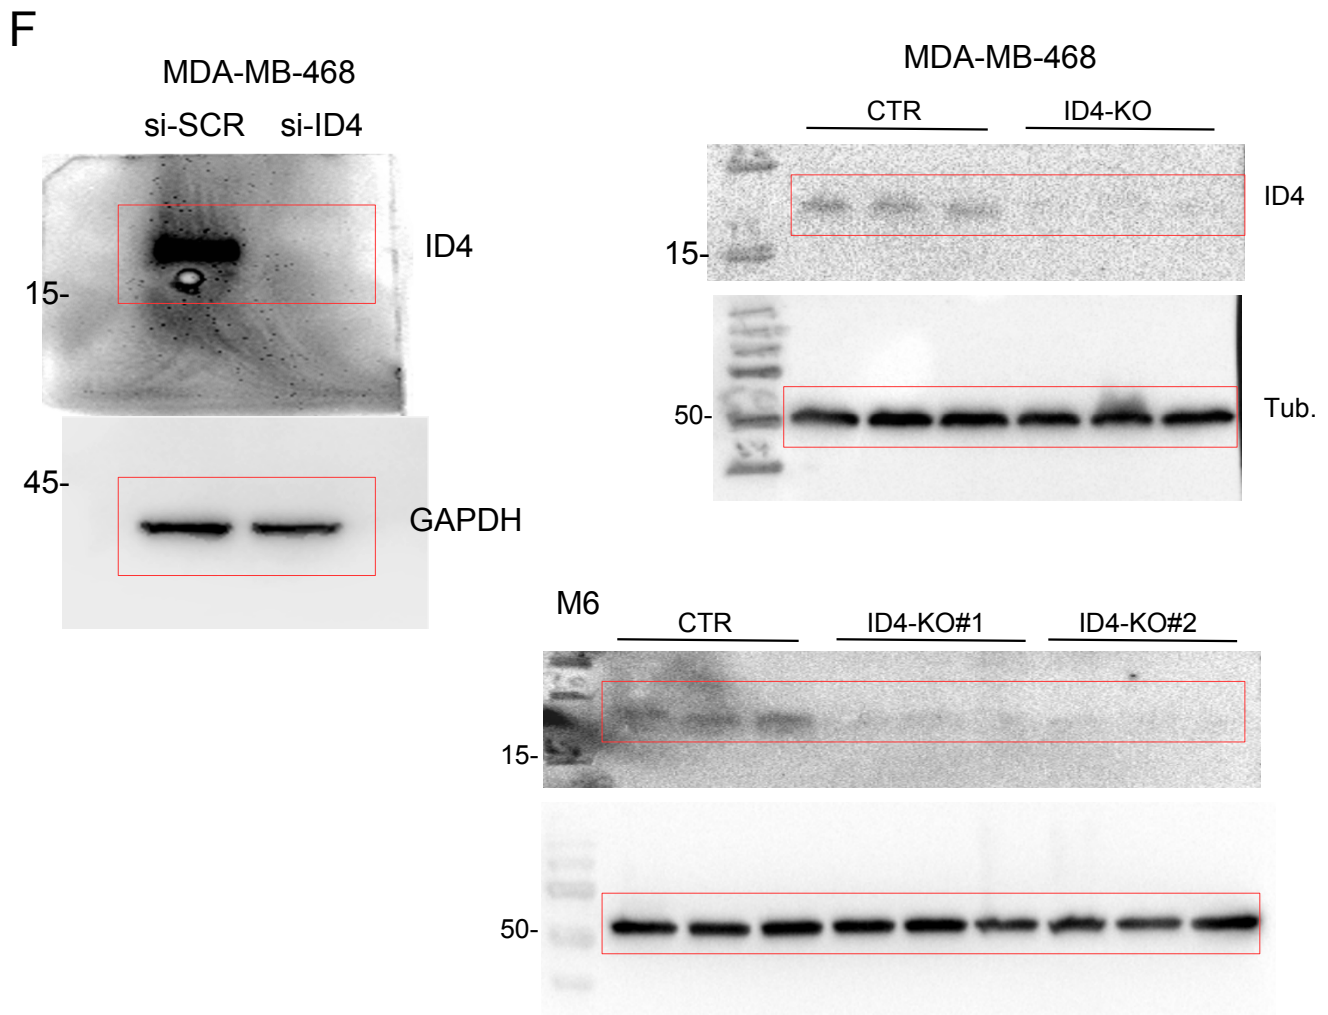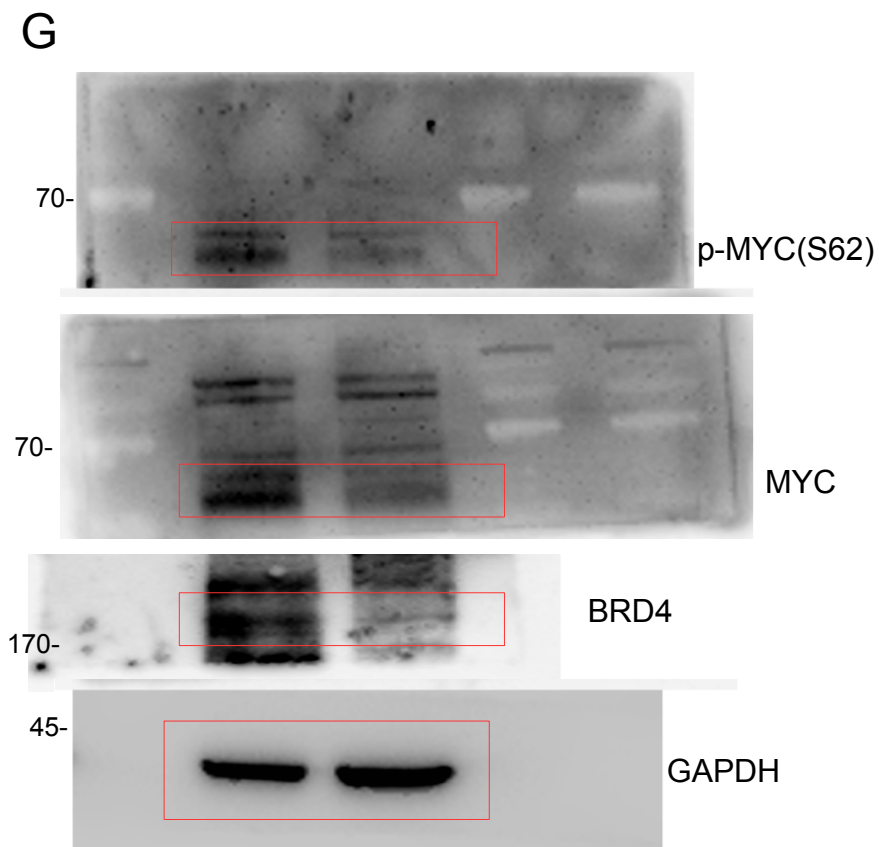

Uncropped blots relative to Figure 7C

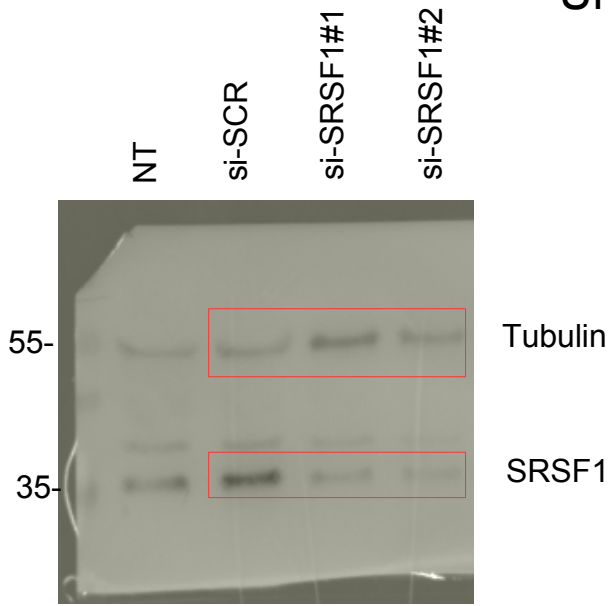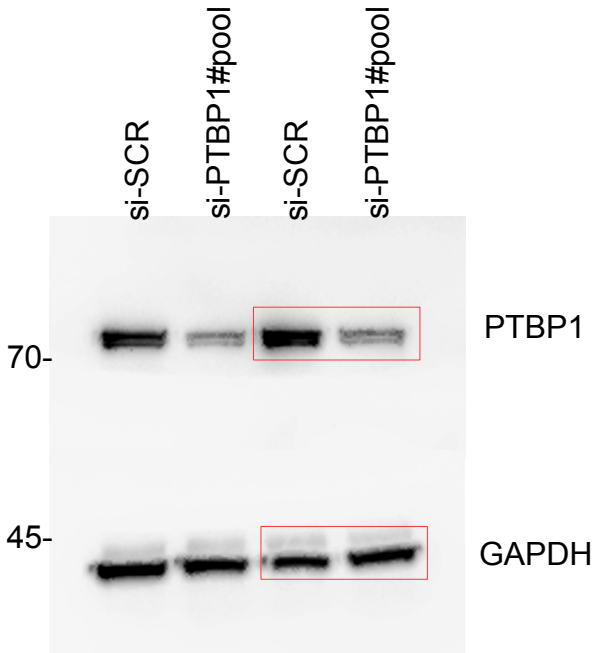



# Uncropped blots relative to Figure 7E

MDA-MB-468

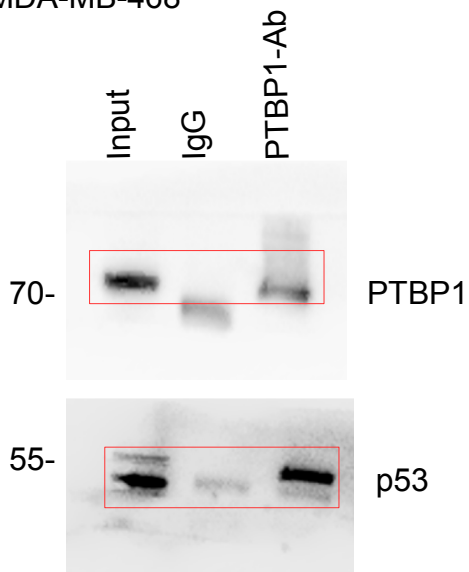

HCC1395

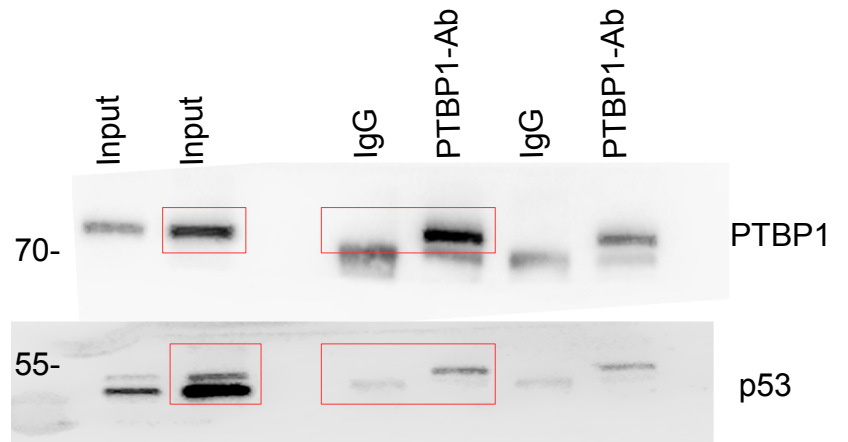

MDA-MB-468

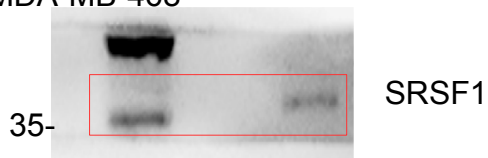

HCC1395

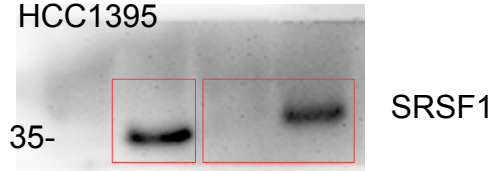

MDA-MB-468

HCC1395

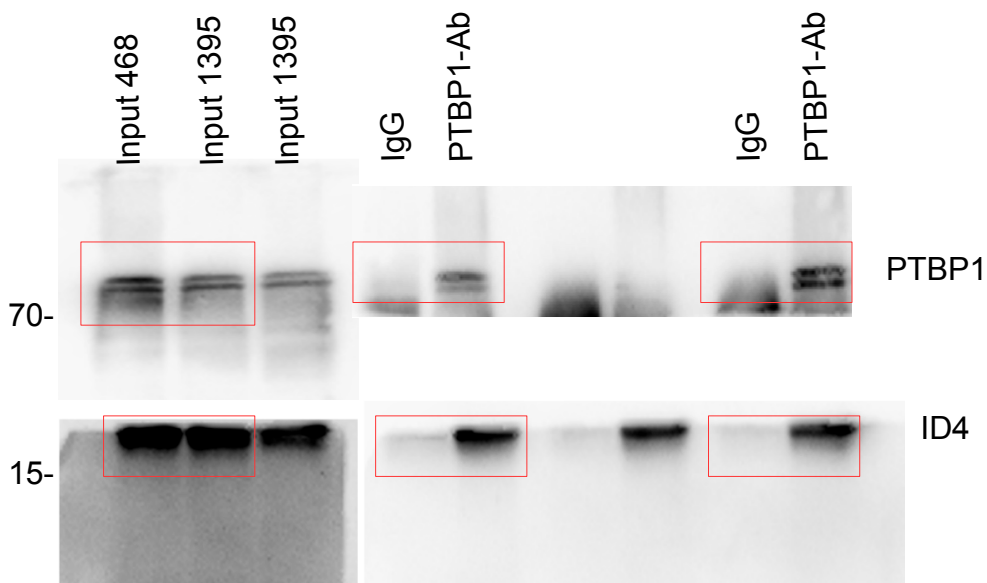

Supplement: 42003_2022_3539_MOESM2_ESM.pdf [file 42003_2022_3539_MOESM2_ESM.pdf]
