# Supplementary material for: MALAT1-dependent hsa_circ_0076611 regulates translation rate in triple-negative breast cancer
Source: PubMed Central journal article supplement (PMC9203778; doi:10.1038/s42003-022-03539-x), 2022-06-16
Supplement: 42003_2022_3539_MOESM3_ESM.pdf [file 42003_2022_3539_MOESM3_ESM.pdf]

## Description of Additional Supplementary Files

**File name:** Supplementary Data 1

**Description:** List of oligonucleotides used in PCR/qPCR and for the gene editing of human and mouse ID4 by CRISPR/Cas9.
