# Supplementary material for: MALAT1-dependent hsa_circ_0076611 regulates translation rate in triple-negative breast cancer
Source: PubMed Central journal article supplement (PMC9203778; doi:10.1038/s42003-022-03539-x), 2022-06-16
Supplement: 42003_2022_3539_MOESM4_ESM.pdf [file 42003_2022_3539_MOESM4_ESM.pdf]

**Supplementary Data File 1.** List of oligonucleotides used in PCR/qPCR and for the gene editing of human and mouse ID4 by CRISPR/Cas9

| <b>RT-qPCR</b>            | <b>Sequence</b>                                     |
|---------------------------|-----------------------------------------------------|
| <b>VEGF121</b>            |                                                     |
| Ex3_F                     | 5' -CCCACTGAGGAGTCCAACAT-3'                         |
| Ex5-8_R                   | 5' -CCTCGGCTTGTACATTTTTCTTGTC-3'                    |
| Ex4_probe_FAM             | 5' -AAGGCCAGCACATAGGAGAGAT-3'                       |
| <b>VEGF165</b>            |                                                     |
| Ex7_F                     | 5' -CGCAGACGTGTAAATGTTTCCT-3'                       |
| Ex8_R                     | 5' -GCCTCGGCTTGTACATC-3'                            |
| Ex7_probe_FAM             | 5' -CAAGGCGAGGCAGCTTGAGTTAAA-3'                     |
| <b>Circular VEGFA</b>     |                                                     |
| Ex7_div_F                 | 5' -CGCAGACGTGTAAATGTTTCCT-3'                       |
| Ex7_div_R                 | 5' -AGGAACATTTACACGTCTGCG-3'                        |
| Ex7_div_F2                | 5' -AAACACAGACTCGCGTTGC-3'                          |
| Ex7_div_R2                | 5' -CAAATGCTTTCCTCCGCTCTG-3'                        |
| circ_0076611 Taqman probe | /5'6-FAM/AA CGT ACT T/ZEN/G CAG TCC CTG T/3'IABkFQ/ |
| <b>VEGFA</b>              |                                                     |
| Ex7_conv_F                | 5' -GAGCGGAGAAAGCATTTGTT-3'                         |
| Ex7_conv_R                | 5' -GCGAGTCTGTGTTTTTGCAG-3'                         |
| 5'UTR_F                   | 5' -GTCGAGGAAGAGAGACGG-3'                           |
| 5'UTR_R                   | 5' -CCCAAAGCAGGTCCTCAC-3'                           |
| <b>ID4</b>                |                                                     |
| For                       | 5' -GTGCGATATGAACGACTGCT-3'                         |
| Rev                       | 5' -CAGGATCTCCACTTTGCTGA-3'                         |
| <b>MALAT1</b>             |                                                     |
| For                       | 5' -GGGAAGGCGAAGAAAAGAAT-3'                         |
| Rev                       | 5' -TGCCCTTAGCTTTTTGTTTCC-3'                        |
| <b>PTBP1</b>              |                                                     |
| For                       | 5' -GCTGCACCTCTCCAACATCC-3'                         |
| Rev                       | 5' -GTCGTGGTTGTGCAGGTCAA-3'                         |
| <b>c-MYC</b>              |                                                     |
| Ex2_F                     | 5' -AGCTGCTTAGACGCTGGATT-3'                         |
| Ex2_R                     | 5' -AAGTTCCTCCTCGTCGC-3'                            |
| 5'UTR_F                   | 5' -CATCCACGAAACTTTGCCCA-3'                         |
| 5'UTR_R                   | 5' -GCTCGGGTGTGTAAGTTCC-3'                          |
| <b>CXCL16</b>             |                                                     |
| Ex3_F                     | 5' -CTTTCCTGGAGCGTGTGTG-3'                          |
| Ex4_R                     | 5' -GTAAATGCTTCTGGTGGGCC-3'                         |
| <b>CXCL1</b>              |                                                     |

|                                     |                                           |
|-------------------------------------|-------------------------------------------|
| Ex1_F                               | 5' -CTCTTCCGCTCCTCTCACAG-3'               |
| Ex2_R                               | 5' -GGGGACTTCACGTTCACT-3'                 |
| <b>18S</b>                          |                                           |
| For                                 | 5' -AGCATTTGCCAAGAATGTTTTTC-3'            |
| Rev                                 | 5' -CGTCTTCGAACCTCCGACTT-3'               |
| <b>28S</b>                          |                                           |
| Fw                                  | 5' -GTTACCCACTAATAGGGAACG-3'              |
| Rev                                 | 5' -GGATTCTGACTTAGAGGCGTT-3'              |
| <b>5.8S</b>                         |                                           |
| For                                 | 5' -GACTCTTAGCGGTGGATCACTC-3'             |
| Rev                                 | 5' -GACGCTCAGACAGGCGTAG-3'                |
| <b>BRD4</b>                         |                                           |
| Ex7_F                               | 5' -ACGTCCGATTGATGTTCTCC-3'               |
| Ex8_R1                              | 5' -AAAGCGCATTTTGAACACAT-3'               |
| Ex8_F                               | 5' -CGATAGCTCCTCGGACAGTG-3'               |
| Ex8_R2                              | 5' -CGCTCCTCCTCAGAGTCATC-3'               |
| <b>CCNB2</b>                        |                                           |
| For                                 | 5' -TGCAAATCGAGGACATTGA-3'                |
| Rev                                 | 5' -TGTGGGTTTATGGACTGCAA-3'               |
| 5' UTR_F                            | 5' -TGTCCCTCCCTTTTCAGTCCG-3'              |
| 5' UTR_R                            | 5' -GACGGGAAGGCAAGAGT-3'                  |
| <b>NFYB</b>                         |                                           |
| For                                 | 5' -GTTTGCGGTCCCTGTACTTG-3'               |
| Rev                                 | 5' -GAACCGTGTGTCAGTGGTG-3'                |
| <b>GAPDH</b>                        |                                           |
| For                                 | 5' -GAGTCAACGGATTTGGTCGT-3'               |
| Rev                                 | 5' -GACAAGCTTCCCCTTCTCAG-3'               |
| <b>RPL19</b>                        |                                           |
| For                                 | 5' -CGGAAGGGCAGGCACAT-3'                  |
| Rev                                 | 5' -GGCGAAAATCCTCATTCTC-3'                |
| <b>CRISPR-Cas9 oligonucleotides</b> | <b>Sequence</b>                           |
| <i>Human</i>                        |                                           |
| Hs.Cas9.ID4.1.AA                    | 5' -GCACGTTATCGACTACATCC-3' ;<br>PAM: TGG |
| Hs.Cas9.ID4.1.AD                    | 5' -TGTAGTCGATAACGTGCTGC-3' ;<br>PAM: AGG |
| <i>Mouse</i>                        |                                           |
| Hs.Cas9.ID4.1.AA                    | 5' -GCACGTTATCGACTACATCC-3' ; PAM: TGG    |
| Mm.Cas9.ID4.1.AB                    | 5' -GAGCACGGCCACAGCCTGGG-3' ;<br>PAM: TGG |

| <b>Pull-down</b> | <b>Sequence</b>               |
|------------------|-------------------------------|
| Bio_circ_0076611 | CAGGGACTGCAAGTAC/3BioTEG/     |
| Bio_LacZ_1       | GTCATATGCATAAAGCGTTG/3BioTEG/ |
| Bio_LacZ_2       | TTAACGCCGCAGTGGTAGAA/3BioTEG/ |
